# Supplementary material for: A general strategy for the ultrafast surface modification of metals
Source: PubMed Central journal article supplement (PMC5151094; doi:10.1038/ncomms13797), 2016-12-07
Supplement: ncomms13797-s1.pdf [file ncomms13797-s1.pdf]

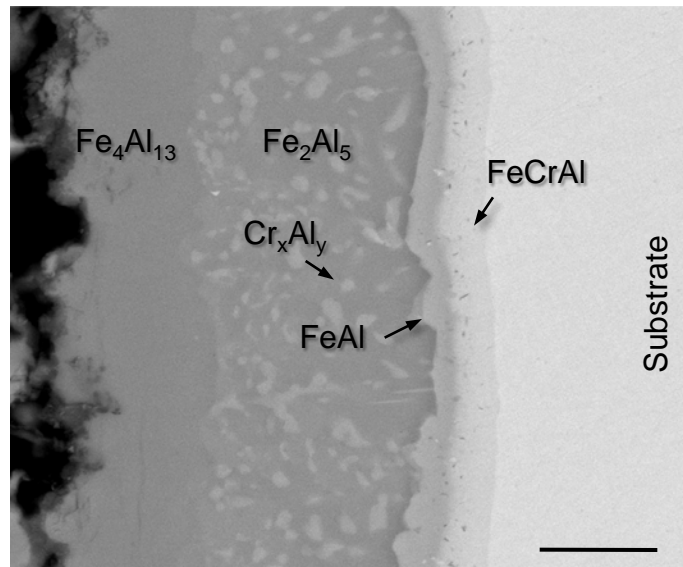

**Supplementary Figure 1 | Conventional aluminizing.** SEM image of the cross-section of the samples aluminized in furnace at 860 °C for 10 minutes, indicating that the microstructure of the aluminized layers is similar to that of the DC-aluminized sample. Scale bar, 10  $\mu\text{m}$ .

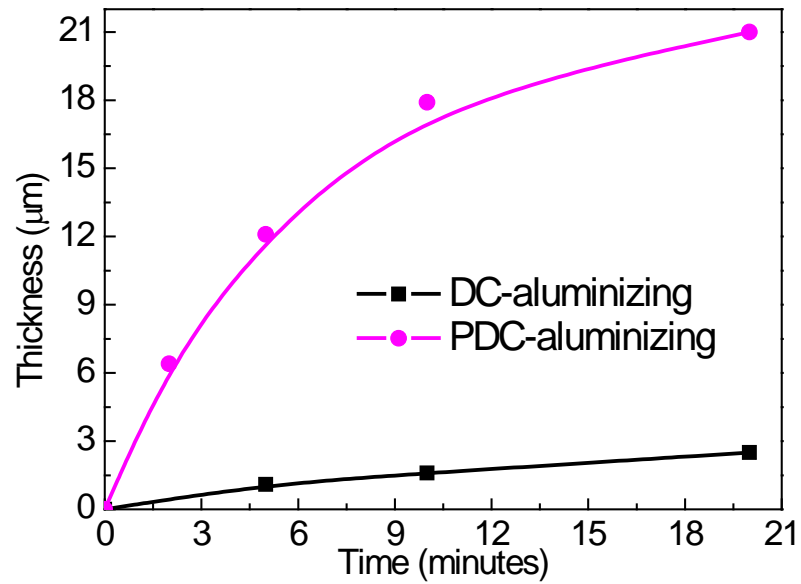

**Supplementary Figure 2 | Growth kinetics of  $\beta$ -FeAl layer.** The growth kinetic curves for the growth of  $\beta$ -FeAl layer in DC- and PDC-aluminized samples.

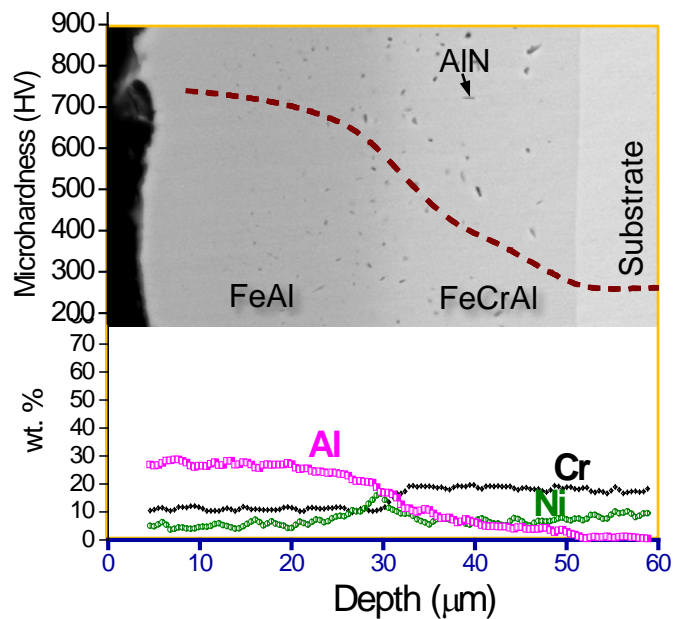

**Supplementary Figure 3 | Characterization of the AC-aluminized layer.** SEM image, EDS composition and indentation depth profile of the cross-section of the aluminized layer after passing AC at  $1200 \text{ A cm}^{-2}$  for 10 minutes.

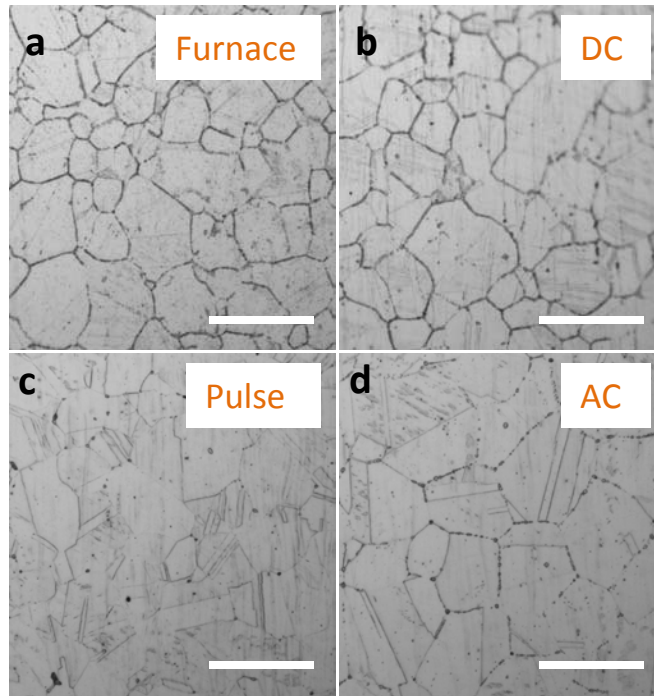

**Supplementary Figure 4 | Metallographic examinations of the substrate after aluminizing. a,** Furnace aluminizing (860 °C, 10 minutes), mean grain size: 18.3  $\mu\text{m}$ , number of twin boundaries per unit length (twin density): 0.05  $\mu\text{m}^{-1}$ . **b,** DC-aluminizing (1300 A  $\text{cm}^{-2}$ , 10 minutes), mean grain size: 19.4  $\mu\text{m}$ , twin density: 0.07  $\mu\text{m}^{-1}$ . **c,** PDC-aluminizing (1400 A  $\text{cm}^{-2}$ , 10 minutes), mean grain size: 19.4  $\mu\text{m}$ , twin density: 0.09  $\mu\text{m}^{-1}$ . **d,** AC-aluminizing (1200 A  $\text{cm}^{-2}$ , 10 minutes), mean grain size: 22.2  $\mu\text{m}$ , twin density: 0.06  $\mu\text{m}^{-1}$ . Scale bar, 50  $\mu\text{m}$ .
